# Supplementary material
Source: HighWire-hosted journal article supplement (https://bmjopen.bmj.com/content/14/11/e080574)
Supplement: inline-supplementary-material-5 [file inline-supplementary-material-5.pdf]

Supplementary Table 1: Overview of the health facilities included in this study

|                               | <b>Management</b>            | <b>Pregnant women in catchment*</b><br>N (Range) | <b>Antenatal clinic attendees*</b><br>N (Range) | <b>Clinicians providing ANC services**</b><br>N (Range) |
|-------------------------------|------------------------------|--------------------------------------------------|-------------------------------------------------|---------------------------------------------------------|
| <b>East New Britain (n=5)</b> |                              |                                                  |                                                 |                                                         |
| Level 4 (n=1)                 | Public                       | 905                                              | 750                                             | 1                                                       |
| Level 3 (n=1)                 | Public                       | 487                                              | 450                                             | 1                                                       |
| Level 2 (n=3)                 | Public (n=1)<br>Church (n=2) | 593 (451- 676)                                   | 433 (216- 604)                                  | 2 (1-2)                                                 |
| <b>Madang (n=4)</b>           |                              |                                                  |                                                 |                                                         |
| Level 4 (n=1)                 | Church                       | 499                                              | 500                                             | 3                                                       |
| Level 3 (n=1)                 | Church                       | 2273                                             | 508                                             | 2                                                       |
| Level 2 (n=2)                 | Public (n=2)                 | 565***                                           | 619 (542-696)                                   | 4 (3-5)                                                 |

\*Annually reported number

\*\*Does not include laboratory technicians or clinicians working in voluntary counselling and testing (VCT) who provide antenatal testing for HIV and syphilis

\*\*\*Health facilities are in the same catchment area, therefore the number of births recorded is the same.
